# Supplementary material
Source: Research Square preprint supplement (doi:10.21203/rs.3.rs-8824718/v1)
Supplement: Supplementary file 1 [file 22a902cc2a70af6b744ca35d.docx]

**Table 1:Roof Form Memetic Extraction**

| Cultural Genes | Chart | Roof Form | Styling Features | Meme Distillation |  |  |  |
| --- | --- | --- | --- | --- | --- | --- | --- |
|  | 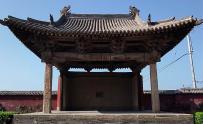 | Single-eave hip roof | 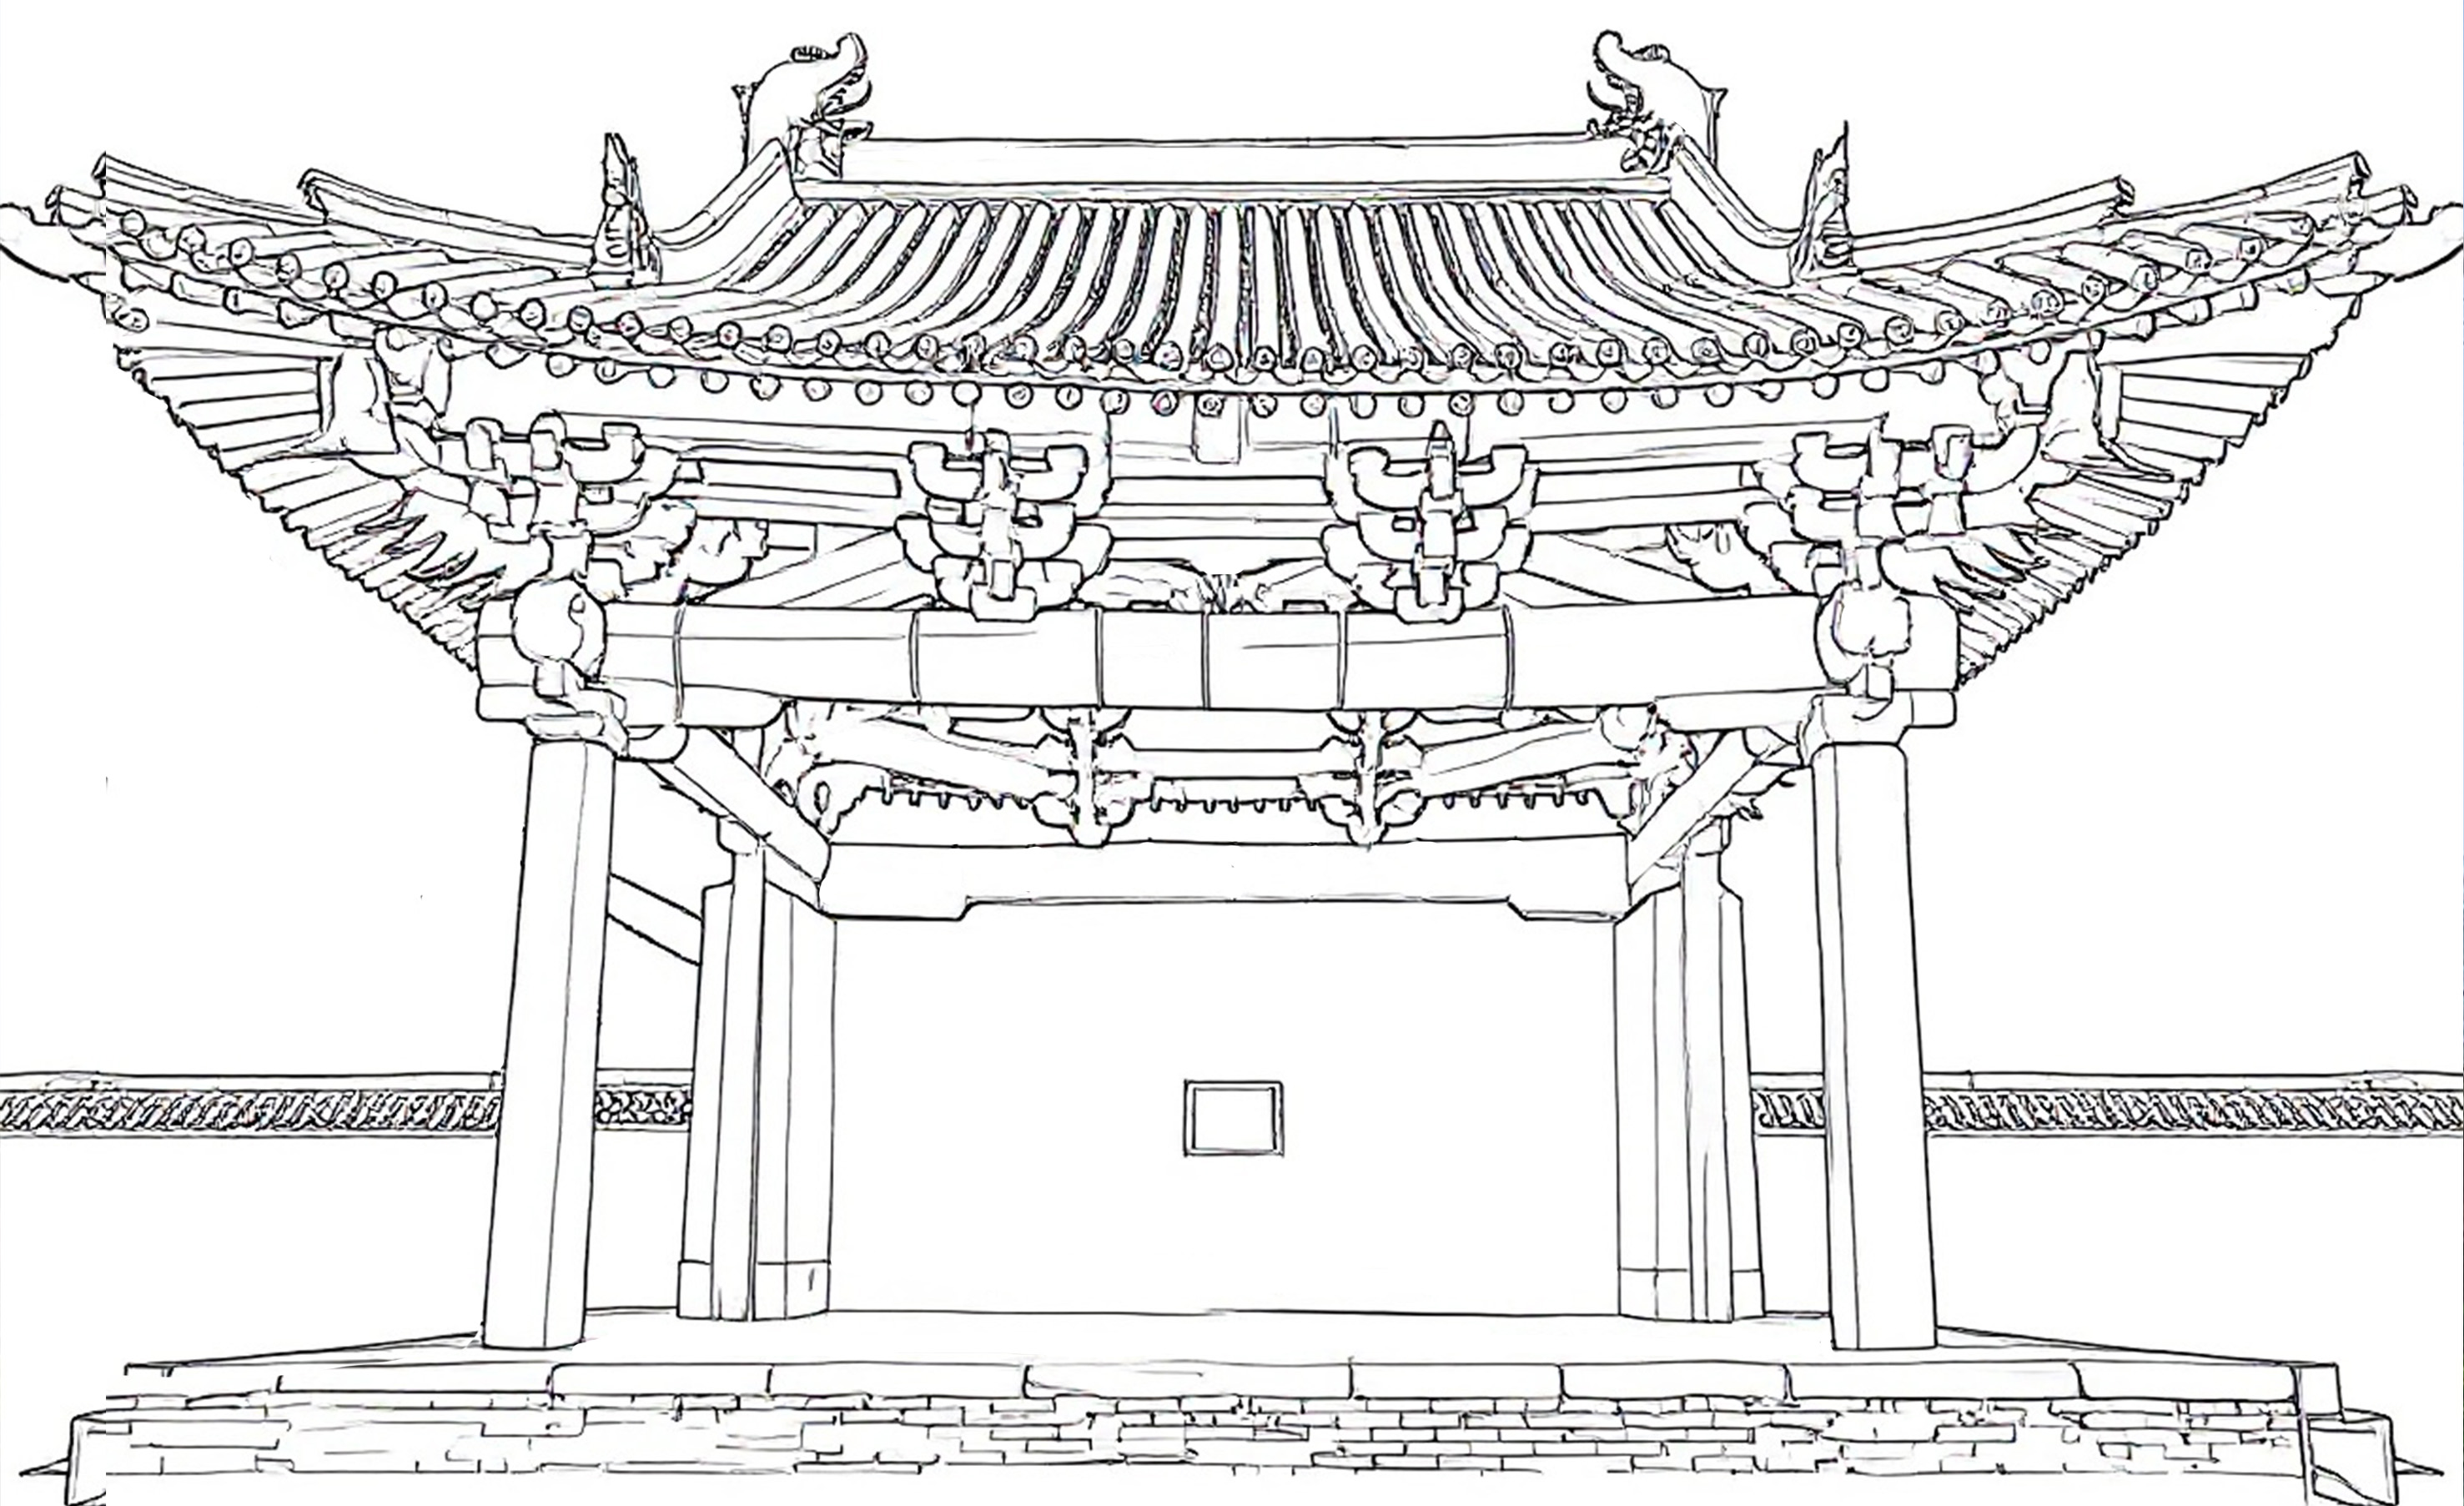 | 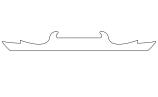 | 0.191 | 0.02 | 0.016 |
|  | 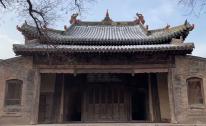 | Double-eaved hipped roof |  | 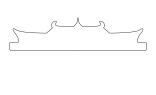 | 0.109 |
|  | 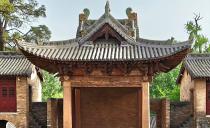 | Single-eave cross gable roof | 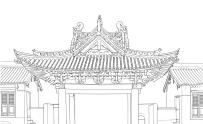 | 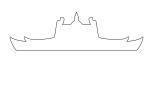 | 0.476 |
|  | 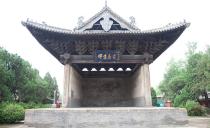 | Single-eave cross gable roof | 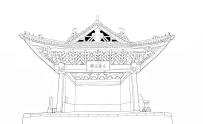 | 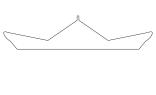 | 0.060 |
|  | 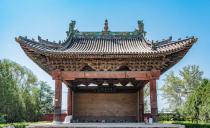 | Single-eave hip roof | 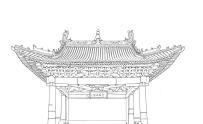 | 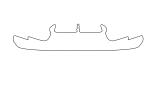 | 0.126 |
|  | 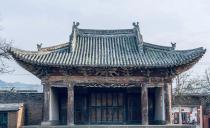 | Single-eave hip roof | 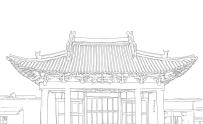 | 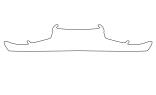 | 0.037 |

**Table 2: Extraction of Structural Form Memes**

| Cultural Genes | Chart | Structural Features | Structure Extraction | Meme Distillation |  |  |  |
| --- | --- | --- | --- | --- | --- | --- | --- |
|  | 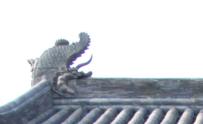 | Chimera | 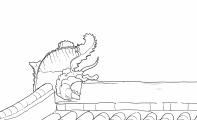 | 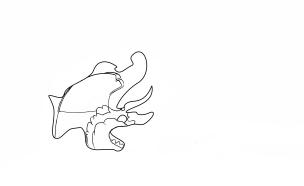 | 0.210 | 0.011 | 0.009 |
|  | 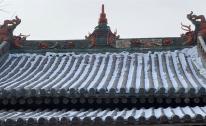 | Finial | 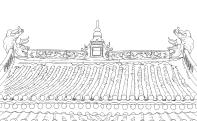 | 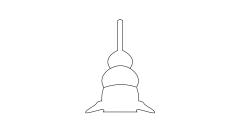 | 0.341 |
|  | 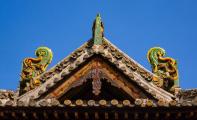 | Pediment | 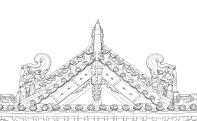 | 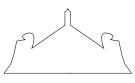 | 0.075 |
|  | 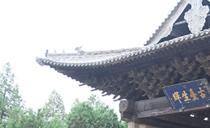 | Eaves | 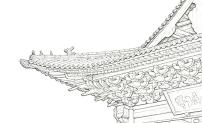 | 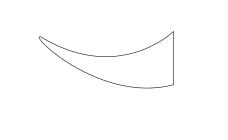 | 0.259 |
|  | 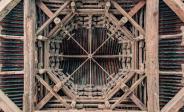 | Coffered ceiling | 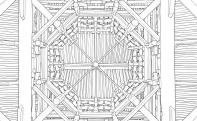 | 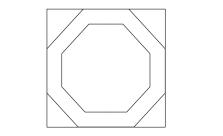 | 0.067 |
|  | 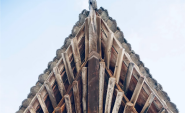 | Dougong | 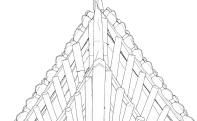 | 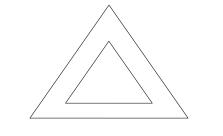 | 0.048 |

**Table 3 Pattern Memes Extraction**

| Cultural Genes | Chart |  | Decorative Extraction | Location | Styling Features | Meme Distillation |  |  |  |
| --- | --- | --- | --- | --- | --- | --- | --- | --- | --- |
|  | 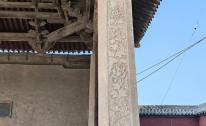 |  | Pillar Pattern | Pillar | 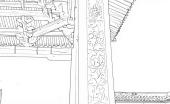 | 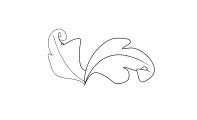 | 0.071 | 0.032 | 0.025 |
|  | 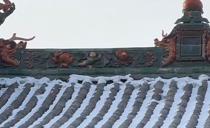 |  | Peony | Spinal Adjustment | 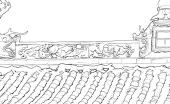 | 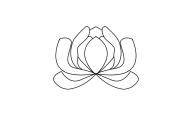 | 0.114 |
|  | 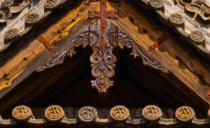 |  | Interlaced scrollwork | Pediment | 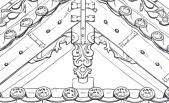 | 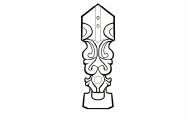 | 0.210 |
|  | 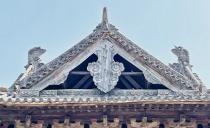 |  | Ruyi Cloud Pattern | Pediment | 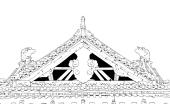 | 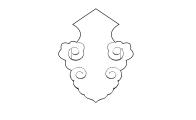 | 0.053 |
|  | 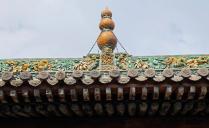 |  | Scrollwork Lotus Pattern | Finial | 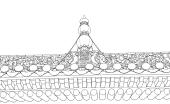 | 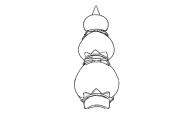 | 0.456 |
|  | 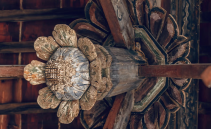 |  | Lotus Petal Pattern | Coffered ceiling | 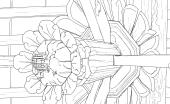 | 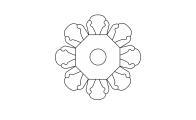 | 0.097 |

**Table 4: Extraction of Material Memes**

| Cultural Genes | | Chart | Building Materials | Styling Features | Meme Distillation | （） |  |  |
| --- | --- | --- | --- | --- | --- | --- | --- | --- |
|  | 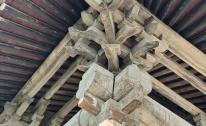 | | Wood | 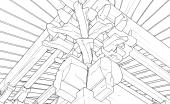 | 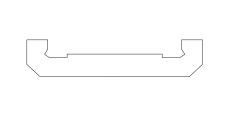 | 0.212 | 0.02 | 0.016 |
|  | 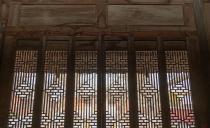 | | Wood | 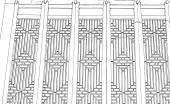 | 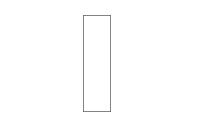 | 0.302 |
|  | 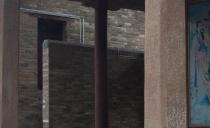 | | Stone | 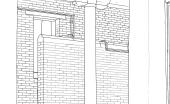 | 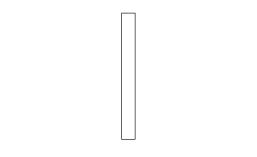 | 0.052 |
|  | 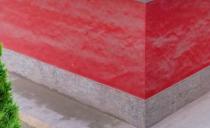 | | Brick | 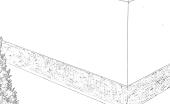 | 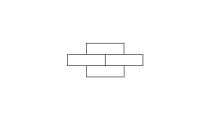 | 0.059 |
|  | 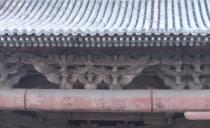 | | Pottery | 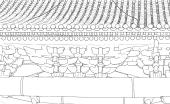 | 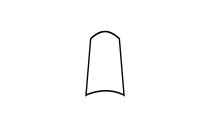 | 0.054 |
|  | 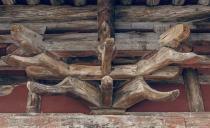 | | Wood | 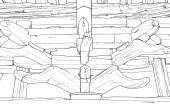 | 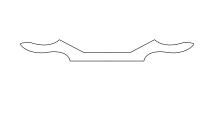 | 0.322 |

**Table 5: Color Meme Extraction**

| Cultural Genes | Chart | Color extraction | CMYK values | Semantics |  | CI | CR |
| --- | --- | --- | --- | --- | --- | --- | --- |
|  | 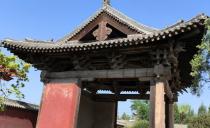 | 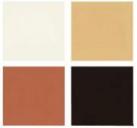 | 4,15,11,0  16,31,51,0  35,69,73,0  79,81,86,68 | Warding off evil spirits, praying for blessings | 0.116 | 0.021 | 0.017 |
|  | 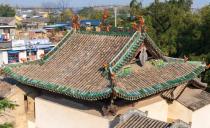 | 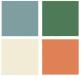 | 56,31,36,0  31,20,43,0  7,8,19,0  23,43,54,0 | auspicious, festive | 0.318 |
|  | 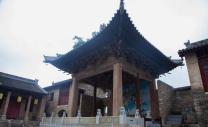 | 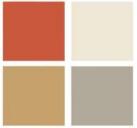 | 8, 12, 20, 62  8，10，18，0  0, 70, 65, 25  5, 8, 18, 35 | Sacred,solemn, prayerful, hierarchical | 0.188 |
|  | 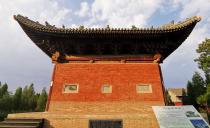 | 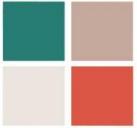 | 82,43,59,1  28,36,36,0  10,11,14,0  18,79,71,0 | Prayer, Vitality | 0.171 |
|  | 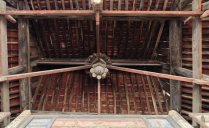 | 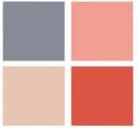 | 54,44,34,0  5,50,35,0  11,28,29,0  18,79,71,0 | Simple, festive, and folk | 0.041 |

**Table 6 Semantic Meme Extraction**

| Cultural Genes | Chart | Keyword | Semantic Extraction | Symbol extraction | Meme Distillation |  |  |  |
| --- | --- | --- | --- | --- | --- | --- | --- | --- |
|  | 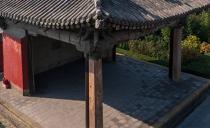 | Gedestal | Moral Edification | 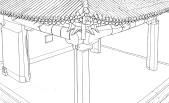 | 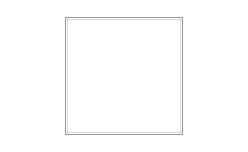 | 0.087 | 0.018 | 0.015 |
|  | 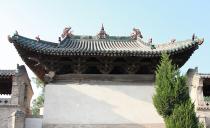 | Orientation and Layout | Theocratic Entertainment | 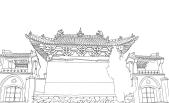 | 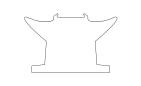 | 0.135 |
|  | 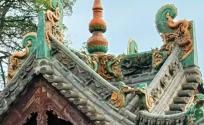 | Glazed tiles | Aesthetic Vitality | 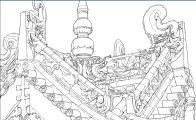 | 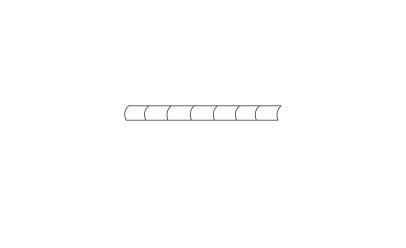 | 0.316 |
|  | 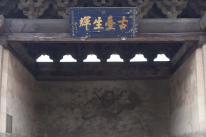 | lintel | Cultural Inclusivity | 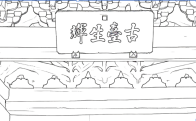 | 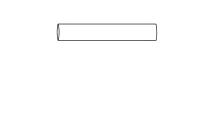 | 0.246 |
|  | 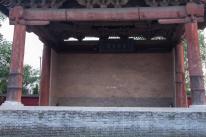 | Column Base Design | Focus on practicality | 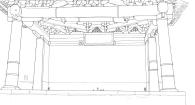 | 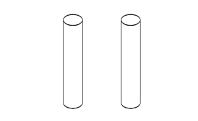 | 0.141 |
|  | 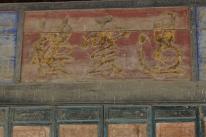 | Plaque | Etiquette and music education function | 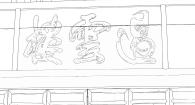 | 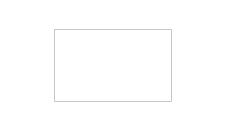 | 0.075 |

**Table 7: Extraction of Spatial Layout Memes**

| Cultural Genes | Chart | Building Layout | Keyword | Symbol extraction | Meme Distillation |  |  |  |
| --- | --- | --- | --- | --- | --- | --- | --- | --- |
|  |  | The order of rites | Central axis symmetry |  |  | 0.310 | 0.014 | 0.011 |
|  |  | Central axis symmetry |  |  | 0.227 |
|  |  | Establishing spatial hierarchy via orientation, elevation, and proximity | Spatial hierarchy |  |  | 0.183 |
|  |  | Spatial hierarchy |  |  | 0.066 |
|  |  | Connecting different functional units | Community composition |  |  | 0.146 |
|  |  | Rectangular platform base | Transitional space |  |  | 0.069 |

**Table 9: Primary Indicator Judgment Matrix**

|  | B1 | B2 | B3 | B4 | B5 | B6 | B7 |
| --- | --- | --- | --- | --- | --- | --- | --- |
| B1 | 1.000 | 0.500 | 2.000 | 6.481 | 3.000 | 5.000 | 7.483 |
| B2 | 2.000 | 1.000 | 3.000 | 7.483 | 5.000 | 6.481 | 9.000 |
| B3 | 0.500 | 0.333 | 1.000 | 5.000 | 2.000 | 3.000 | 6.481 |
| B4 | 0.154 | 0.134 | 0.200 | 1.000 | 0.333 | 0.500 | 2.000 |
| B5 | 0.333 | 0.200 | 0.500 | 3.000 | 1.000 | 2.000 | 3.873 |
| B6 | 0.200 | 0.154 | 0.333 | 2.000 | 0.500 | 1.000 | 3.000 |
| B7 | 0.134 | 0.111 | 0.154 | 0.500 | 0.200 | 0.333 | 1.000 |

**Table 10 Secondary Indicator Judgment Matrix**

|  | C11 | C12 | C13 | C14 | C15 | C16 |
| --- | --- | --- | --- | --- | --- | --- |
|  | 1.000 | 2.000 | 0.316 | 3.000 | 2.000 | 4.899 |
|  | 0.500 | 1.000 | 0.218 | 2.000 | 0.816 | 3.464 |
|  | 3.162 | 4.583 | 1.000 | 7.348 | 4.899 | 8.485 |
|  | 0.333 | 0.500 | 0.136 | 1.000 | 0.354 | 2.000 |
|  | 0.500 | 1.225 | 0.204 | 2.828 | 1.000 | 3.873 |
|  | 0.204 | 0.289 | 0.118 | 0.500 | 0.258 | 1.000 |

**Table 11Secondary Indicator Judgment Matrix**

|  | C21 | C22 | C23 | C24 | C25 | C26 |
| --- | --- | --- | --- | --- | --- | --- |
|  | 1.000 | 0.500 | 3.000 | 0.816 | 4.000 | 4.000 |
|  | 2.000 | 1.000 | 4.472 | 1.225 | 5.196 | 6.481 |
|  | 0.333 | 0.224 | 1.000 | 0.289 | 0.866 | 2.000 |
|  | 1.225 | 0.816 | 3.464 | 1.000 | 4.472 | 4.583 |
|  | 0.250 | 0.192 | 1.155 | 0.224 | 1.000 | 1.581 |
|  | 0.250 | 0.154 | 0.500 | 0.218 | 0.632 | 1.000 |

**Table 12:Secondary Indicator Judgment Matrix**

|  | C31 | C32 | C33 | C34 | C35 | C36 |
| --- | --- | --- | --- | --- | --- | --- |
|  | 1.000 | 0.667 | 0.289 | 1.581 | 0.136 | 0.866 |
|  | 1.500 | 1.000 | 0.577 | 2.828 | 0.236 | 1.000 |
| C33 | 3.464 | 1.732 | 1.000 | 3.742 | 0.354 | 3.162 |
| C34 | 0.632 | 0.354 | 0.267 | 1.000 | 0.200 | 0.354 |
| C35 | 7.348 | 4.243 | 2.828 | 5.000 | 1.000 | 5.657 |
| C36 | 1.155 | 1.000 | 0.316 | 2.828 | 0.177 | 1.000 |

**Table 13:Secondary Indicator Judgment Matrix**

|  | C41 | C42 | C43 | C44 | C45 | C46 |
| --- | --- | --- | --- | --- | --- | --- |
|  | 1.000 | 0.500 | 4.583 | 5.477 | 3.464 | 0.577 |
|  | 2.000 | 1.000 | 6.000 | 5.477 | 5.477 | 0.655 |
|  | 0.218 | 0.167 | 1.000 | 0.816 | 1.000 | 0.200 |
|  | 0.183 | 0.183 | 1.225 | 1.000 | 1.155 | 0.236 |
|  | 0.289 | 0.183 | 1.000 | 0.866 | 1.000 | 0.169 |
|  | 1.732 | 1.528 | 5.000 | 4.243 | 5.916 | 1.000 |

|  | C51 | C52 | C53 | C54 | C55 | C56 |
| --- | --- | --- | --- | --- | --- | --- |
|  | 1.000 | 0.354 | 0.707 | 0.816 | 0.500 | 3.000 |
| C52 | 2.828 | 1.000 | 1.291 | 2.449 | 2.449 | 6.000 |
| C53 | 1.414 | 0.775 | 1.000 | 1.225 | 1.000 | 4.243 |
| C54 | 1.225 | 0.408 | 0.816 | 1.000 | 1.414 | 4.583 |
| C55 | 2.000 | 0.408 | 1.000 | 0.707 | 1.000 | 5.000 |
| C56 | 0.333 | 0.167 | 0.236 | 0.218 | 0.200 | 1.000 |

**Table 14:Secondary Indicator Judgment Matrix**

**Table 15:Secondary Indicator Judgment Matrix**

|  |  |  |  |  |  |  |
| --- | --- | --- | --- | --- | --- | --- |
|  | 1.000 | 0.500 | 0.250 | 0.471 | 0.612 | 1.291 |
|  | 2.000 | 1.000 | 0.333 | 0.655 | 0.816 | 1.732 |
|  | 4.000 | 3.000 | 1.000 | 1.291 | 1.732 | 4.000 |
|  | 2.121 | 1.528 | 0.775 | 1.000 | 2.000 | 4.472 |
|  | 1.633 | 1.225 | 0.577 | 0.500 | 1.000 | 1.414 |
|  | 0.775 | 0.577 | 0.250 | 0.224 | 0.707 | 1.000 |

**Table 16:Secondary Indicator Judgment Matrix**

|  |  |  |  |  |  |  |
| --- | --- | --- | --- | --- | --- | --- |
|  | 1.000 | 1.414 | 2.000 | 4.583 | 1.500 | 5.477 |
|  | 0.707 | 1.000 | 1.225 | 4.000 | 1.414 | 3.464 |
|  | 0.500 | 0.816 | 1.000 | 3.162 | 1.183 | 3.000 |
|  | 0.218 | 0.250 | 0.316 | 1.000 | 0.577 | 1.000 |
|  | 0.667 | 0.707 | 0.845 | 1.732 | 1.000 | 1.528 |
|  | 0.183 | 0.289 | 0.333 | 1.000 | 0.655 | 1.000 |

**Table 17 Consistency Test Results**

| Indicator | B1 | C1 | C2 | C3 | C4 | C5 | C6 | C7 | Consistency Check |
| --- | --- | --- | --- | --- | --- | --- | --- | --- | --- |
|  | 7.124 | 6.100 | 6.054 | 6.159 | 6.100 | 6.105 | 6.092 | 6.072 |  |
| CI | 0.021 | 0.020 | 0.011 | 0.032 | 0.020 | 0.021 | 0.018 | 0.014 | pass through |
| RI | 1.360 | 1.260 | 1.260 | 1.260 | 1.260 | 1.260 | 1.260 | 1.260 |  |
| CR | 0.015 | 0.016 | 0.009 | 0.025 | 0.016 | 0.017 | 0.015 | 0.011 |  |

**Table 18: AHP Weighting Results**

| Factor |  |  |  |  |  |  |  |  |  |  |  |  |
| --- | --- | --- | --- | --- | --- | --- | --- | --- | --- | --- | --- | --- |
| Architectural Memes |  |  |  |  |  |  |  |  |  |  |  |  |
| Weight | 0.341 | 0.259 | 0.476 | 0.191 | 0.456 | 0.210 | 0.318 | 0.246 | 0.316 | 0.322 | 0.302 | 0.310 |
| Composite Weighting | 0.047 | 0.117 | 0.128 | 0.097 | 0.034 | 0.073 | 0.012 | 0.013 | 0.030 | 0.019 | 0.015 | 0.008 |

**Table 19 Weight Value Sorting**

| Product Performance | Absolute Weight | Relative Weight | Sorting |
| --- | --- | --- | --- |
| Form Symbolism Innovation (D1) | 1.168 | 15.1 | 1 |
| Stage Structure Recognition (D2) | 0.586 | 7.9 | 8 |
| Structural Adaptability (D3) | 0.8 | 10.8 | 3 |
| Cultural Product Function Clarity (D4) | 0.683 | 9.2 | 4 |
| Decorative Pattern Innovation (D5) | 0.389 | 5.3 | 11 |
| Cultural Element Integration (D6) | 0.82 | 11.1 | 2 |
| Wood Material Properties (D7) | 0.401 | 5.41 | 10 |
| Architectural Color Aesthetics (D8) | 0.656 | 8.9 | 5 |
| Semantic Expression Accuracy (D9) | 0.489 | 6.6 | 9 |
| Cultural Connotation Transmission Clarity (D10) | 0.636 | 8.6 | 6 |
| Spatial Imagery Transformation (D11) | 0.181 | 2.4 | 12 |
| Emotional Resonance and Interactivity (D12) | 0.598 | 8.1 | 7 |

**Table 20 Initial Evaluation Matrix**

| Product Performance | Option One | Option Two | Option Three |
| --- | --- | --- | --- |
| Form Symbolism Innovation (D1) | 8.2 | 7.83 | 7.63 |
| Stage Structure Recognition (D2) | 5.11 | 3.74 | 4.17 |
| Structural Adaptability (D3) | 6.97 | 6.17 | 6.23 |
| Cultural Product Function Clarity (D4) | 6.26 | 5.4 | 5.49 |
| Decorative Pattern Innovation (D5) | 5 | 3.74 | 3.69 |
| Cultural Element Integration (D6) | 7.23 | 7 | 6.34 |
| Wood Material Properties (D7) | 4.69 | 4.2 | 3.6 |
| Architectural Color Aesthetics (D8) | 4.86 | 3.66 | 3.86 |
| Semantic Expression Accuracy (D9) | 4.86 | 3.57 | 3.86 |
| Cultural Connotation Transmission Clarity (D10) | 4.66 | 3.6 | 3.69 |
| Spatial Imagery Transformation (D11) | 4.66 | 3.74 | 3.51 |
| Emotional Resonance and Interactivity (D12) | 4.49 | 3.77 | 3.51 |

**Table 21 Standardized Evaluation Matrix**

|  |  |  |  |  |  |  |  |  |  |  |  |  |
| --- | --- | --- | --- | --- | --- | --- | --- | --- | --- | --- | --- | --- |
| Option 1 | 0.600 | 0.674 | 0.622 | 0.631 | 0.689 | 0.608 | 0.647 | 0.675 | 0.679 | 0.671 | 0.672 | 0.657 |
| Option 2 | 0.573 | 0.493 | 0.551 | 0.544 | 0.516 | 0.589 | 0.579 | 0.508 | 0.499 | 0.518 | 0.540 | 0.552 |
| Option 3 | 0.558 | 0.550 | 0.556 | 0.553 | 0.509 | 0.533 | 0.496 | 0.536 | 0.539 | 0.531 | 0.507 | 0.514 |
